# Potential contribution of climate conditions on COVID-19 pandemic transmission over West and North African countries

Ibrahima Diouf <sup>1 \*</sup>, Souleymane Sy <sup>2 \*</sup>, Habib Senghor <sup>3</sup>, Papa Fall <sup>4</sup>, Diarra Diouf <sup>5</sup>, Moussa Diakhaté <sup>6,5</sup>, Wassila M. Thiaw <sup>1</sup>, Amadou T. Gaye <sup>5</sup>

<sup>1</sup> NOAA Center for Weather and Climate Prediction, 5830 University Research Court, College Park, Maryland 20740, USA.

<sup>2</sup> Italian National Research Council (CNR), Institute of Methodologies for Environmental Analysis (CNR-IMAA), Tito Scalo (Potenza), Italy

<sup>3</sup> Agence Nationale de l'Aviation civile et de la Météorologie (ANACIM), Aéroport Léopold Sédar Senghor, BP : 8184 Dakar-Yoff, Sénégal.

<sup>4</sup> Unité de Formation et de Recherche de Sciences Appliquées et de Technologie, Université Gaston Berger de Saint-Louis, BP 234, Saint-Louis 32000, Sénégal.

<sup>5</sup> Laboratoire de Physique de l'Atmosphère et de l'Océan-Siméon Fongang, Ecole Supérieure Polytechnique de l'Université Cheikh Anta Diop (UCAD), BP 5085, Dakar-Fann, Sénégal.

<sup>6</sup> École Supérieure des Sciences et Techniques de l'Ingénieur, Université Amadou Mahtar MBOW (UAM) de Dakar, Dakar 11000, Sénégal.

Content Type: Article

Submitted: to PLOSE ONE Journal

Date: 1/20/2021

\* Corresponding Author: [ibrahima.diouf@noaa.gov](mailto:ibrahima.diouf@noaa.gov)

## 32 Abstract

33 The COVID-19 disease, caused by the Severe Acute Respiratory Syndrome Coronavirus 2  
34 (SARS-CoV-2), is a very contagious disease that has killed many people around the world.  
35 According to the World Health Organization (WHO) data, the spread of the disease appears to be  
36 slower in Africa. Although a number of studies have been published on the relationship between  
37 meteorological parameters and COVID-19 transmission, the effects of climate conditions on  
38 COVID-19 remain largely unexplored and without consensus following the main research finding  
39 over Africa (often based on a single country or city). Here, using available epidemiological data  
40 over 275 days (i.e., from March 1 to November 30, 2020) taken from the European Center for  
41 Disease Prevention and Control of the European Union database and daily data of surface air  
42 temperature and humidity from the National Center for Environmental Prediction (NCEP), this  
43 paper investigates the potential contributions of climate conditions on COVID-19 transmission over  
44 16 countries selected from three bioclimatic regions of Africa (i.e., Sahel, Maghreb and Gulf of  
45 Guinea). On average, our main findings highlight statistically significant inverse correlations  
46 between COVID-19 cases and temperature over the Maghreb and the Gulf of Guinea regions,  
47 whereas positive correlations are found in the Sahel, especially over the central part including Niger  
48 and Mali. Correlations with specific humidity and water vapor parameters display significant and  
49 positive values over the Sahelian and the Gulf of Guinean countries and negative values over the  
50 Maghreb countries. In other word, results imply that the COVID-19 pandemic transmission is  
51 influenced differently across the three bioclimatic regions: i) cold and dry environmental conditions  
52 over the Maghreb; ii) warm and humid conditions over the Sahel iii) cold and humid conditions  
53 over the Gulf of Guinea. These findings could be useful for decision-makers who plan public health  
54 and control measures in affected African countries and would have substantial implications for  
55 directing respiratory disease surveillance activities.

56

57 **Keywords:** COVID-19 pandemic, Climate conditions, Health, West Africa, North Africa

58

59

60

61

62

63

64

65

## 66 **Introduction**

67           The coronaviruses constitute a family of various viruses affecting both humans and animals.  
68 In late December 2019, the World Health Organization (WHO) was informed about an epidemic of  
69 "pneumonia of unknown cause" detected in the city of Wuhan (Hubei Province, China), the  
70 seventh-largest city in China, with 11 million inhabitants [1,2]. The first reported infected  
71 individuals were associated to the Wuhan seafood market in southern China. The virus causing the  
72 epidemic was quickly determined to be a novel coronavirus linked to the Middle Eastern  
73 Respiratory Syndrome Coronavirus (MERS-CoV) and to the Severe Acute Respiratory Syndrome  
74 Coronavirus 2 (SARS-CoV-2) [3]. Infected travelers, mainly by aircraft, are known to be  
75 responsible for the introduction of the virus outside Wuhan [4]. The novel coronavirus so-called  
76 2019-nCoV in the early parts of the epidemic has spread rapidly to multiple countries and has been  
77 declared on March 11, 2020, as a pandemic by the WHO. The 2019-nCoV terminology changed  
78 later and become Coronavirus Disease 2019 (COVID-19).

79           Researchers who have been working on this epidemic believe that this coronavirus probably  
80 originates from bats [5,6]. This hypothesis is based on the SARS epidemic in 2003 that emerged in  
81 southern China after being transmitted from the bat, its "natural reservoir", to humans [7]. Indeed,  
82 the COVID-19 disease shares 80% of genetic similarity [7]. The infection caused a wide range of  
83 symptoms and showed different degrees of severity with different fatality rates that are country  
84 dependent. Symptoms may appear 2-14 days after exposure to the virus [8]. People with these  
85 symptoms or combinations of symptoms may have cough and shortness of breath or difficulty  
86 breathing. Transmission can take place by air, in contact with secretions or contaminated objects.  
87 The mortality rate is found to be relatively lower compared to SARS-Cov which was estimated  
88 around 15% [8]. The most sensitive people are the elderly, those suffering from respiratory and  
89 immunosuppressed pathologies.

90  
91           One of the central questions facing the scientific community is how climate conditions  
92 contribute to COVID-19 transmission. Chan et al.,[9] investigations on the past SARS coronavirus  
93 outbreaks have put in evidence that the viability of the virus was lost at high temperatures (e.g.,  
94 38°C) and high humidity (e.g., > 95%) and this explains the lower number of cases in Asian  
95 countries including Malaysia due to higher temperature and humidity. The first studies from China  
96 have shown that the contagiousness of the COVID-19 is higher in the cities in the north with a  
97 lower humidity value and lower temperatures than those over the south-eastern coasts with warm  
98 and humid conditions [10,11]. Meteorological variables such as air temperature, humidity, and other  
99 parameters including solar radiation have been also found to act differently concerning coronavirus

100 survival [12]. Although several studies have supported the hypothesis that climate conditions may  
101 affect the COVID-19 pandemic transmission as happens with other viruses such as influenza  
102 [13,14], respiratory syncytial virus [15,16], considerable disagreement is evident among the  
103 different investigations (often based on different country or city); most of them have concluded that  
104 the COVID-19 transmission prefers cold and dry weather conditions - i.e. temperature and humidity  
105 related variables are negatively correlated to the virus transmission [12,17–22] and [23] (for a  
106 review) -, while others studies have reported contradictory results showing that temperature and/or  
107 humidity variables may positively associated, or not be associated with the COVID-19 expansion  
108 [24–28]. The majority of the above-mentioned papers were focused on Asian and European  
109 countries (i.e., mid-latitude regions). Few studies have investigated the effects of weather conditions  
110 on the incidence of COVID-19 pandemic transmission over Africa and the results have even less  
111 consensus (often based on a single country or city) [29–31].

112 In addition, it is worth pointing out that since the first cases of coronavirus appeared in Africa  
113 (early March 2020), the spread of the disease seems to be progressing more slowly there than else-  
114 where. The five most affected countries at this time are South Africa, Algeria, Morocco, Egypt, and  
115 Cameroon, with a very slow infection rate compared to the mid-latitudes or south America countries  
116 (see, Fig 1). Nevertheless, it is still not fully understood how climate conditions contribute to  
117 COVID-19 transmission in Africa.

118 The outlined scenario shows that further studies and reviews are needed to extend the analysis  
119 available in literature and to quantify the possible relationship between climate conditions and  
120 coronavirus transmission in Africa. To address these issues, here, using available epidemiological  
121 data over 275 days (1 March - November 30, 2020) extracted from the European Center for Disease  
122 Prevention and Control of the European Union ([https://www.ecdc.europa.eu/en/publications-  
123 data/download-todays-data-geographic-distribution-covid-19-cases-worldwide](https://www.ecdc.europa.eu/en/publications-data/download-todays-data-geographic-distribution-covid-19-cases-worldwide)) and daily data of  
124 surface air temperature and humidity from the National Center for Environmental Prediction  
125 (NCEP), the present study aimed to investigate the potential contributions of climate conditions on  
126 COVID-19 pandemic transmission in 16 highly populated West and North African countries divided  
127 into three bioclimatic regions (i.e., Maghreb, Sahel and Gulf of Guinea) [32].

128 The present work is organized as follows: Section 2 outlines the data used and the statistical  
129 methods applied. Section 3 investigates the spatial distribution of COVID-19 confirmed cases  
130 throughout countries in North and West Africa and their potential relationship with climate condi-  
131 tions. Finally, a summary and discussion of the main findings are provided in Section 4.

## 132 **Data and Methods**

## 133 **Surveillance COVID-19 data**

134 The clinical data corresponds to the number of COVID-19 cases over 16 West and North  
135 African countries recorded by the European Center for Disease Prevention and Control of the  
136 European Union, and all age-groups were screened ([https://www.ecdc.europa.eu/en/publications-  
137 data/download-todays-data-geographic-distribution-covid-19-cases-worldwide](https://www.ecdc.europa.eu/en/publications-data/download-todays-data-geographic-distribution-covid-19-cases-worldwide)). The countries were  
138 selected based on their high population density and the regularity of the reported daily positive  
139 cases. The selected countries include the Maghreb countries (Algeria, Egypt, Libya, Morocco and  
140 Tunisia), the Sahelian countries (Burkina-Faso, Mali, Niger and Senegal) and Gulf of Guinea  
141 countries (Ivory Coast, Ghana, Guinea Conakry, Liberia, Nigeria, Sierra Leone and Togo). Note, the  
142 number of observed COVID-19 cases is available for the selected countries from March 1 to  
143 November 30, 2020 and datasets are obtained at country level. These cases are clinically confirmed  
144 by the Polymerase Chain Reaction (PCR) tests, as recommended by the WHO.

## 145 **Climate dataset**

146 Due to the lack of recent continuous observed weather station datasets over the selected  
147 countries, reanalysis climate datasets are used. Reanalysis is a systematic approach to produce  
148 datasets for climate monitoring and research [33]. We use daily data of surface air temperature,  
149 relative humidity, and specific humidity from NCEP datasets provided by the NOAA [33] with  
150  $2.5^{\circ} \times 2.5^{\circ}$  horizontal resolution over the North and West Africa. Besides those variables, the Water  
151 Vapor variable (WV; g/kg) is estimated following [11,14,34–40] methodology (see equation 1),  
152 where RH represents the relative humidity, T the air temperature, and P the atmospheric pressure.  
153 Note the climate variables for the period from February 15 to November 30, 2020 (i.e., 15 days  
154 before the first reported COVID-19 cases) are selected in the analysis to take into consideration the  
155 virus incubation period not considered in many investigations over Africa [29,30,41]. In other term,  
156 because of 97.5% of the infected people develop symptoms after 11 days of incubation [42], climate  
157 variables are 15-days back time-shifted. This imply that the daily number of positive COVID-19  
158 cases from 1 March 2020 to 30 November 2020 are the result of infections that happened from 15  
159 February 2020 to 15 November 2020. This approach is inspired to [43].

160

$$161 \quad WV = 6.22 \times RH \times \left[ \frac{\exp\left(\frac{17.67 \times T}{T + 243.5}\right)}{P} \right] \quad (1)$$

162

163 Africa through the northern part is mainly characterized by different types of climates [44], as  
164 we mentioned above, the selected countries were divided into three contrasted bio-climate zones  
165 based on a classification that closely fits with Köppen-Geiger bio-climatic zones [32,45]:

- 166 i) the Maghreb (North Africa) countries are mainly characterized by winter rains and  
167 summer drought [46]. The rainfall regime is variable but predominantly bimodal in north  
168 part, with fall and spring peaks. The rainy seasons correspond with the short days–cool  
169 temperature period (from November to April). This category includes hyper-humid to  
170 hyper-arid bioclimates, with mean annual rainfalls of 2,330 mm over the North East of  
171 Algeria, and 1,530 mm over the North West of Tunisia [32] decreasing to virtually zero  
172 in the central–eastern Sahara. Mean annual temperature may vary from less than 10°C in  
173 the highlands of Algeria and Morocco to 25 °C in the north and central Sahara [32];
- 174 ii) the Sahel region represents a transition zone between the Saharan desert and the wet  
175 climate of tropical Africa. The Sahelian countries have a tropical semi-arid climate  
176 which is typically hot, sunny, dry and somewhat windy. The bio-climate is characterized  
177 by a monomodal (unimodal) type of rainfall distribution pattern, i.e., there is only one  
178 annual peak in the rainy season, lagged with the summer solstice by a 1–2-month time  
179 lag [32,45];
- 180 iii) the Gulf of Guinea with equatorial bio-climate, always humid, are characterized by a  
181 bimodal rainfall distribution pattern (i.e., there are two peaks in the rainy season  
182 following the seasonal position Intertropical Convergence Zone (ITCZ)), although some  
183 particular climatic characteristics can be found in countries like Nigeria with hot-dry,  
184 hot-humid, temperate-dry, temperate-humid, and temperate-dry with a cool climate [47].

## 186 **Statistical Analysis**

187 Two non-linear robust and non-parametric rank correlation tests were implemented to analyze the  
188 potential effects of the climate conditions on the COVID-19 pandemic transmission and to discuss  
189 their statistical significance:

190 (i) the Kendall rank correlation non-parametric test  $\tau$  is showed in Equation 2, where *concor*  
191 represents the number of concordant pairs, while *discor* represents the discordant pairs, and *n* is the  
192 number of pairs [48].

$$193 \quad \tau = \frac{\text{concor} - \text{discor}}{0.5n(n-1)} \quad (2)$$

194 ii) The Spearman rank correlation non-parametric test  $r_s$  is described in Equation 3 below, where  $d_i$   
195 represents the difference between the ranks of two parameters and *n* the number of alternatives [48].

$$196 \quad r_s = 1 - \frac{6x \sum_i^n d_i^2}{nx(n^2-1)} \quad (3)$$

197 Note more descriptions of the statistical methods used can be found in [42,47]. Nevertheless, it is  
198 worth pointing out that values of  $\tau$  and  $r_s$  equal to +1 and -1 implying a perfect positive and negative  
199 association/correlation, respectively. The main reason for using the non-parametric Kendall and  
200 Spearman statistical test is that it tends to be more powerful and better suited for non-normally  
201 distributed variables compared with parametric statistical tests such as the Pearson test [48]. As the  
202 distribution of COVID-19 cases data and climate variables are not necessarily Gaussian, the non-  
203 parametric Kendall and Spearman statistical tests might be more appropriate for testing the null  
204 hypothesis of the association/correlation between the two given variables [49,50].

205 In addition, the correlation coefficients are often computed between two time series (e.g., two time  
206 series representing, respectively, the number of daily COVID-19 cases and daily average  
207 temperatures or humidity) [29–31], without taking into account for the possible presence of cycles  
208 or temporal trends in the data, which can strongly affect the estimated correlation values and yield  
209 artefactual associations. In the present paper, the daily cases of COVID-19 are fitted with the robust  
210 and non-parametric Median-Based Linear Model (MBLM) defined in [49]. As it can be easily  
211 observed (see section next section) that the COVID-19 cases data does not follow a Gaussian  
212 distribution, however as discussed above, the non-parametric MBLM model might be more  
213 powerful and better suited compared with parametric linear models [49].

## 214 **Results and Discussion**

### 215 **Spatio-temporal variability of COVID-19 cases**

216 Fig 2 shows the patterns of the total number of COVID-19 confirmed cases between March 1,  
217 to November 30, 2020 over all the considered countries. It becomes obvious that the COVID-19  
218 pandemic transmission varies in different regions during the study time period. The highest  
219 outbreak ranging up to more than ~300000 cases is located in the Maghreb countries mainly  
220 including Morocco and Egypt. The number of COVID-19 cases ranges between 5000 to 10000  
221 cases in the Sahelian countries and 50000 to 200000 cases in the Gulf of Guinea countries. The  
222 lowest number of cases is observed over in the central of the Sahel.

223  
224 Fig 3 further shows that more occurrences of COVID-19 cases are observed over the northern  
225 part of Africa in Maghreb countries compared to the Sahel and the Gulf of Guinea. Fig 3A, with y-  
226 axis is capped at ~400000 COVID-19 cases for Morocco and 80000 for the other northern  
227 countries, shows a rapid spread of COVID-19 cases in the Maghreb with the largest trend for  
228 Morocco and Egypt. Until the end of July, the evolution of confirmed COVID-19 cases in Tunisia,

229 and Libya was very slow, but a rapid increase is also noted since August. For the Maghreb, it is only  
230 in Libya that very few COVID-19 cases are recorded, Tunisia does not exceed 1000 cases in three  
231 months and a half, while the maximum number of cases are developed in the Maghreb countries  
232 like Egypt, Algeria, and Morocco. In Fig 3B related to the Sahel; the largest number of COVID-19  
233 cases are observed in Senegal with a rapid expansion since the pandemic start. A stationary situation  
234 was observed since mid-September. A more homogeneous distribution is found between the rest of  
235 Sahelian countries (Fig 3B) where the y-axis could be capped at 3000 COVID-19 cases instead of  
236 15000 cases like in Senegal. In the Gulf of Guinea (Fig 3C) with COVID-19 approaching 50000 in  
237 Ghana and 70000 cases in Nigeria after eight months of the pandemic. Some small West African  
238 countries such as Sierra Leone, Liberia, and Togo have cumulated COVID-19 cases less than 1000  
239 cases, while some countries such as Ivory Coast and Guinea Conakry exhibit an intermediate  
240 situation. For the 3 subzones, the first two months of the time period are marked by overall flat  
241 curves of the cumulated COVID-19 cases.

242 In Fig 4, we compare the fitted COVID-19 cases with MBLM model to the daily observed  
243 cases for each of the three bio-climatic regions. The residuals with respect to the reported data (i.e.,  
244 the differences between the MBLM fitted curve and the observed curve) are considered.  
245 Considering the residuals, makes the analysis independent on the period of lockdown or restriction,  
246 being the correlation analysis strongly dependent on the considered time period. The MBLM model  
247 accounts for the natural trend of viral epidemics and the effect of the lockdown on it. This approach  
248 is also followed in [43]. Thus, the residual analysis should preserve from spurious correlations  
249 between the above-mentioned effects and the parameters under analysis. The Spearman and Kendall  
250 rank correlations have been then computed between the residuals of COVID-19 cases with respect  
251 to the MBLM model, extrapolated from the data trend, and the detrended anomaly of the  
252 meteorological parameters with 15 days back time-shifted to take into account the virus incubation  
253 period as discussed above.

254

255 Although a number of studies have considered the relationship between meteorological  
256 parameters and positive COVID-19 cases, it worth pointing out that the daily new positives variable  
257 is highly correlated to the number of performed test, i.e., the more the test performed, the more  
258 positives COVID-19 cases are found. In addition, delays in processing tests and false  
259 positives/negatives, being not uncommon and frequently reported, are factors that might introduce a  
260 bias in the analysis. For this reason, daily spikes in cases, without considering the incubation period,  
261 can be totally uncorrelated with the climate variables as discussed in [40].



## 262 Spatio-temporal variability of climate parameters

263 Fig 5 shows the seasonal patterns of climate parameters including temperature, specific humidity  
264 and water vapor variables through the North and West Africa. A strong seasonal temperature regime  
265 (with high-temperature values during JJA and lower temperature values during September-  
266 November) associated with a slight seasonal humidity regime is observed. Comparing the seasonal  
267 patterns of climate parameters across the three seasons (i.e., during MAM, JJA, and SON), the  
268 highest values of temperature are located over the North part of the Sahel during summer (Fig 5A),  
269 while the lowest values are found over the Gulf of Guinea countries (Fig 5B). The low values of  
270 humidity and water vapor are found in the Northern area up to the central part of the Sahel (Figs  
271 5D, E and F). In the Gulf of Guinea part, the temperature decreased from March to August, while  
272 the specific humidity and water vapor increased (Figs 5B-5H) mainly due to the fact that the Gulf of  
273 Guinea area usually received substantial rains sustaining associated with high humidity and lower  
274 temperatures. Whilst over Sahelian countries, low values of humidity are observed compared to the  
275 Gulf of Guinea part, with a wetter period in summer associated with the northward shift of the main  
276 tropical rainfall band. Over the Maghreb countries, a well-marked cool period is observed during  
277 the spring and is associated with a slight decreasing of humidity and water vapor content. These  
278 seasonal climate conditions may differently contribute to enhancing/reducing COVID-19 pandemic  
279 transmission across the different considered regions.

280 In Fig 6, the daily COVID-19 cases anomaly (residuals) with respect to the climate parameters  
281 over the three bio-climatic zones are shown. In the Maghreb, the positive anomalies of the daily  
282 COVID-19 cases are clearly observed when the climatic parameters (i.e., temperature, humidity and  
283 water vapor) have simultaneously a downward trend as at the beginning and towards the end of the  
284 time period (Figs 6A and B). However, for the Sahel (Figs 6C and D) and the Gulf of Guinea (Figs  
285 6E and F), the positive anomalies of COVID-19 cases are found during the summer, when these  
286 regions experience a high value of humidity and water vapor.

287 In S1 Table, the daily variation of the meteorological parameters is also shown, together with a  
288 statistical analysis. It can be noticed that the mean temperature in Maghreb countries was  
289  $25.86 \pm 6.24^\circ\text{C}$  (mean  $\pm$  Standard deviation) with low humidity of around  $7.51 \pm 1.60$  (g/kg) and water  
290 vapor around  $13.18 \pm 3.40$  (g/kg). Over the Sahel, the mean temperature was estimated  $29.96 \pm 2.76$   
291  $^\circ\text{C}$  with high amount humidity ( $12.65 \pm 5.23$ ; g/kg) and water vapor ( $20.72 \pm 8.37$  g/kg) two times  
292 larger compared to the Maghreb countries. In the Gulf of Guinea, the mean temperature was also  
293 estimated  $27.39 \pm 2.16$   $^\circ\text{C}$  with high amount of humidity ( $17.67 \pm 2.89$ ; g/kg) and water vapor  
294 ( $27.50 \pm 4.21$ ; g/kg) during the considered period (i.e., from March 1, to November 30, 2020).

## 295 **Relationship between COVID-19 and climate parameters**

296 The contribution of the meteorological variables (temperature, humidity and water vapor) on the  
297 COVID-19 pandemic transmission in Africa were investigated and correlation coefficient values are  
298 estimated using the robust and non-parametric Kendall ( $\tau$ ) (Fig 7) and Spearman (S1 Fig in  
299 supplementary material) rank tests. In Fig 7 (and in S1 Fig), the statistically significant correlations  
300 with 99% confidence intervals, that is, correlations that passed the Kendall/ Spearman rank tests at  
301 0.01 level (i.e.,  $p < 0.01$ ; 99% C.I), are reported in green dots and those that passed the  
302 Kendall/Spearman rank tests at 0.05 level (i.e.,  $p < 0.05$ ; 95% C.I), are reported in black dots. As  
303 described above, the correlation is investigated against the residual of COVID19 cases with a time-  
304 shift of 15 days, i.e., meteorological data from 15 February 2020 to 15 November 2020 and daily  
305 number of positive COVID-19 cases from 1 March 2020 to 30 November 2020 to take into  
306 consideration the incubation period. Note, we have chosen to show the correlation values calculated  
307 with Kendall test in Fig 7, because it is more insensitive to error and discrepancies in data, with p-  
308 values more accurate than Spearman's rho test [48].

309 Fig 7 (top panel) highlights that statistically significant inverse correlations (i.e. with  $p < 0.01$ ;  
310 99% C.I ) are clearly found between COVID-19 cases and surface air temperatures over most of the  
311 Maghreb countries (Tunisia, Morocco and Libya) and in all of the Gulf of Guinea countries except  
312 Togo, while significant positive correlations (i.e. with  $p < 0.01$ ; 99% C.I ) between COVID-19 cases  
313 and surface air temperature are found in the Sahel, especially over the central part including Niger  
314 and Mali. Despite positive correlations between COVID-19 cases and surface air temperature were  
315 found in some specific Maghreb countries such as Egypt and Algeria mainly due to the dry hot  
316 weather associated with higher temperatures exceeding 38°C in Egypt and Algeria's southern  
317 regions located in the north and central Sahara as shown in Figs 5A and 5C. Nevertheless, on  
318 average, statistically significant inverse correlations between COVID-19 cases and temperature are  
319 highlight over the Maghreb and the Gulf of Guinea, whereas positive correlations are found in the  
320 Sahel.

321 Considering the correlations with humidity and water vapor parameters, the Fig 7 (middle and  
322 bottom panels) display significant and negative values over all the Maghreb countries and positive  
323 values is most countries over the Gulf of Guinea. Over the Sahel, the significant and high positive  
324 correlations ( $\tau=0.6$ ,  $p < 0.01$ ; 99% C.I) are observed over Senegal where the highest transmission of  
325 the COVID-19 pandemic are reported (Fig 3B), while negative and non-significant correlations can  
326 be observed in Burkina Faso, Mali and Niger. Comparing S1 Fig (i.e., correlation values calculated  
327 with Spearman rank test) and results shown in Fig 7 (i.e., Kendall rank test versus Spearman rank  
328 test), our results are even more robust because all correlations have the same sign. The magnitude of

329 correlations is however lower in the Kendall test mainly because of its high insensitivity to error  
330 and discrepancies in datasets compared to Spearman rank test.

331

332 On the other hand, given the average, our results highlight that the COVID-19 pandemic  
333 transmission is differently affected across the three bioclimatic regions:

334 i) cold and dry environmental conditions over the Maghreb; these results imply that over the  
335 Maghreb countries, the COVID-19 transmission is strongly influenced by a decrease of  
336 temperature that connects to a decrease of humidity and water vapor content. These results  
337 confirm previous findings [11,12,12,17,18,20–22,38,51,52], that virus transmission is  
338 enhanced by cold and dry climates conditions and may partly explain the high number of  
339 COVID-19 pandemic transmission observed in autumn over the Maghreb countries (Fig 4A,  
340 Fig 6B and S2A Fig).

341 ii) warm and humid conditions over the Sahel; these results highlight that over the Sahel, the  
342 COVID-19 pandemic transmission prefers warm and humid environmental conditions. In  
343 other words, COVID-19 is strongly influenced by an increase in temperature associated with  
344 an increase in humidity and water vapor. Such findings contrast with the results found over  
345 the Maghreb countries and other studies suggesting that summer weather could reduce  
346 COVID-19 transmission [53] but confirm some previous findings (e.g. [54]), and may partly  
347 explain the high number of COVID-19 pandemic transmission (i.e. the peak) experienced in  
348 most countries during the period May-August (Figs 4B and S2B Fig).

349 iii) relatively cold and humid conditions over the Gulf of Guinea; these results highlight that  
350 the COVID-19 transmission over the Gulf of Guinea countries is enhanced by a decrease of  
351 temperature associated with an increase of humidity and water vapor. In other words,  
352 COVID-19 transmission is strongly enhanced by cooler and humid climates conditions.  
353 Such findings also confirm the previous findings (e.g.,[25,26]) and may explain the  
354 observed peak of the COVID-19 cases experienced in the Gulf of Guinea countries during  
355 the period May-August (Fig 4C and Fig 6E and S2C Fig).

## 356 **Conclusions**

357 An extension of the analysis available in literature for the quantification of the relationship between  
358 climatic variables and COVID-19 pandemic transmission in North and West Africa is presented in  
359 this paper. The contributions of climate conditions on the COVID-19 transmission have been  
360 studied in 16 most highly populated West and North African countries divided into three bioclimatic  
361 regions (i.e., the Maghreb, the Sahel and the Gulf of Guinea) based on Köppen bioclimatic

362 classification [32]. The correlation between the basic meteorological variables and virus  
363 transmission over 275 days was investigated from March 1, 2020 to November 30, 2020 at each of  
364 the considered country and at regional level. To assess the correlation, differently from other studies  
365 [29–31], here, we considered as a reliable variable the residuals of the daily new positive cases with  
366 respect to the robust and non-parametric Median-Based Linear Model (MBLM) defined in [49].  
367 Further, when working on the residuals, makes our analysis independent on the analyzed time  
368 period. Also, we have taken into consideration the incubation period, i.e., the correlations were  
369 investigated against the residual of COVID-19 cases with a time-shift of 15 days, - i.e.,  
370 meteorological data from 15 February 2020 to 15 November 2020 was used in the analysis. The  
371 strongest finding of this paper is that the COVID-19 pandemic transmission is differently affected  
372 across the three bioclimatic regions. First of all, over the Maghreb countries, our results highlight  
373 that the COVID-19 transmission is strongly enhanced by a decrease of temperature associated with  
374 a decrease of humidity and water vapor, i.e., cold and dry environmental conditions. Such findings  
375 are consistent with previous studies available in the literature [11,12,17,18,20–22,30,38,52,55]  
376 supporting the hypothesis that COVID-19 transmission prefers cold and dry weather conditions,  
377 while more robust because they are often limited on a single country or city and/or considering a  
378 short period of COVID-19 reported data. Over the Sahel, our results show that the COVID-19  
379 pandemic transmission prefers warm and humid climate conditions. In other words, the virus  
380 transmission is strongly influenced by an increase in temperature associated with an increase in  
381 humidity and water vapor. Such findings contrast with the studies suggesting that summer weather  
382 could reduce COVID-19 transmission (e.g.[53]) but are consistent with some previous studies  
383 available in the literature (e.g. [54]) and [23] (for a review), and may partly explain the high number  
384 of COVID-19 cases experienced in most of Sahelian countries during the period May-August (Fig  
385 4B and S2B Fig). Finally, over the Gulf of Guinea, cold and humid conditions are found to enhance  
386 the COVID-19 transmission. In other words, COVID-19 transmission is strongly enhanced by a  
387 decrease of temperature associated with an increase of humidity and water vapor. Such findings also  
388 confirm the previous findings available in the literature (e.g. [25,26]) and may related to the  
389 observed peak of number cases experienced in most of the Gulf of Guinea countries during the  
390 period May-August (Fig 4C and Fig 6E and S2C Fig).

391

392 Another important aspect of this paper is that this is, to our knowledge, the first work based in three  
393 bioclimatic regions (i.e., the Maghreb, the Sahel and the Gulf of Guinea) using COVID-19 datasets  
394 reported over 275 days (i.e., 09 months) and investigating the correlation against the residual of  
395 COVID-19 cases with a time-shift of 15 days, i.e., taking into consideration the incubation period.  
396 The results from this analysis suggest that further studies are needed to investigate why in three

397 considered bioclimatic regions, the virus transmission is differently affected by the climate  
398 conditions. These results can promote further studies in other bioclimatic regions testing also the  
399 effects of air-pollution related variables, such as the concentration of the Particulate Matter with an  
400 aerodynamic diameter less than 2.5 micron (PM<sub>2.5</sub>), the Nitrogen Dioxide (NO<sub>2</sub>) and Carbon  
401 Monoxide. Therefore, this work contributes to increasing attention and encourages further studies to  
402 improve our understanding of the underlying factors that control the relationship between climate  
403 conditions and COVID-19.

404

## 405 **Acknowledgments**

406 We thank the Ministère de l'Enseignement supérieur de la Recherche et de l'Innovation (MESRI)  
407 Sénégal du Sénégal; whose grant awarded the achievement of this study. We would also like to  
408 thank the different institutions from which the authors of this work are affiliated.

## 409 **Author contributions**

410 A.T.G and W.T. established our consortium and initiated the project. I.D assisted by S.S, H.S, P.F,  
411 D.D and M.D performed the experimental activities, analyzed the data, and drafted and wrote the  
412 initial manuscript. A.T.G and W.T. designed and supervised the study and performed discussion  
413 related to COVID-19 context. S.S contributed significantly to the data analysis, interpretations and  
414 the discussions of the results and improved the draft. All authors discussed the results and helped to  
415 improve the manuscript. All authors agree on the final version of the manuscript.

## 416 **Conflicts of Interest**

417 We hereby certify that the none of the authors have any conflict of interest for the present  
418 manuscript.

## 419 **Data Availability**

420 The data underlying the results presented in the study are available from:  
421 [https://www.ecdc.europa.eu/en/publications-data/download-todays-data-geographicdistribution-](https://www.ecdc.europa.eu/en/publications-data/download-todays-data-geographicdistribution-covid-19-cases-worldwide)  
422 [covid-19-cases-worldwide](https://www.ecdc.europa.eu/en/publications-data/download-todays-data-geographicdistribution-covid-19-cases-worldwide) (for the COVID-19 Data)

423 [http://iridl.ldeo.columbia.edu/SOURCES/.NOAA/.NCEP-](http://iridl.ldeo.columbia.edu/SOURCES/.NOAA/.NCEP-.NCAR/.CDAS1/.DAILY/.Intrinsic/.PressureLevel/)  
424 [NCAR/.CDAS1/.DAILY/.Intrinsic/.PressureLevel/](http://iridl.ldeo.columbia.edu/SOURCES/.NOAA/.NCEP-.NCAR/.CDAS1/.DAILY/.Intrinsic/.PressureLevel/) (for the Climate Data)

## 425 **References**

- 426 1. Chen N, Zhou M, Dong X, Qu J, Gong F, Han Y, et al. Epidemiological and clinical  
427 characteristics of 99 cases of 2019 novel coronavirus pneumonia in Wuhan, China: a  
428 descriptive study. *The Lancet*. 2020;395: 507–513.
- 429 2. Lu H, Stratton CW, Tang Y-W. Outbreak of pneumonia of unknown etiology in Wuhan, China:  
430 The mystery and the miracle. *J Med Virol*. 2020;92: 401–402.
- 431 3. Petersen E, Koopmans M, Go U, Hamer DH, Petrosillo N, Castelli F, et al. Comparing SARS-  
432 CoV-2 with SARS-CoV and influenza pandemics. *Lancet Infect Dis*. 2020.
- 433 4. Bogoch II, Watts A, Thomas-Bachli A, Huber C, Kraemer MU, Khan K. Potential for global  
434 spread of a novel coronavirus from China. *J Travel Med*. 2020;27: taaa011.
- 435 5. Zhou P, Yang X-L, Wang X-G, Hu B, Zhang L, Zhang W, et al. A pneumonia outbreak  
436 associated with a new coronavirus of probable bat origin. *nature*. 2020;579: 270–273.
- 437 6. Zhong NS, Zheng BJ, Li YM, Poon LLM, Xie ZH, Chan KH, et al. Epidemiology and cause of  
438 severe acute respiratory syndrome (SARS) in Guangdong, People’s Republic of China, in  
439 February, 2003. *The Lancet*. 2003;362: 1353–1358.
- 440 7. Petrosillo N, Viceconte G, Ergonul O, Ippolito G, Petersen E. COVID-19, SARS and MERS:  
441 are they closely related? *Clin Microbiol Infect*. 2020;26: 729–734.  
442 doi:10.1016/j.cmi.2020.03.026
- 443 8. Adhikari SP, Meng S, Wu Y-J, Mao Y-P, Ye R-X, Wang Q-Z, et al. Epidemiology, causes,  
444 clinical manifestation and diagnosis, prevention and control of coronavirus disease (COVID-  
445 19) during the early outbreak period: a scoping review. *Infect Dis Poverty*. 2020;9: 1–12.
- 446 9. Chan KH, Peiris JSM, Lam SY, Poon LLM, Yuen KY, Seto WH. The Effects of Temperature  
447 and Relative Humidity on the Viability of the SARS Coronavirus. *Adv Virol*. 2011;2011: 1–7.  
448 doi:10.1155/2011/734690
- 449 10. Ma Y, Zhao Y, Liu J, He X, Wang B, Fu S, et al. Effects of temperature variation and humidity  
450 on the death of COVID-19 in Wuhan, China. *Sci Total Environ*. 2020;724: 138226.  
451 doi:10.1016/j.scitotenv.2020.138226
- 452 11. Wang J, Tang K, Feng K, Lin X, Lv W, Chen K, et al. High Temperature and High Humidity  
453 Reduce the Transmission of COVID-19. Rochester, NY: Social Science Research Network;  
454 2020 Mar. Report No.: ID 3551767. doi:10.2139/ssrn.3551767

- 455 12. Liu Y, Ning Z, Chen Y, Guo M, Liu Y, Gali NK, et al. Aerodynamic characteristics and RNA  
456 concentration of SARS-CoV-2 aerosol in Wuhan hospitals during COVID-19 outbreak.  
457 BioRxiv. 2020.
- 458 13. Shaman J, Kohn M. Absolute humidity modulates influenza survival, transmission, and  
459 seasonality. *Proc Natl Acad Sci*. 2009;106: 3243–3248.
- 460 14. Diouf I, Fonseca BR, Caminade C, Thiaw WM, Deme A, Morse AP, et al. Climate Variability  
461 and Malaria over West Africa. *Am J Trop Med Hyg*. 2020;102: 1037–1047.
- 462 15. Baker RE, Mahmud AS, Wagner CE, Yang W, Pitzer VE, Viboud C, et al. Epidemic dynamics  
463 of respiratory syncytial virus in current and future climates. *Nat Commun*. 2019;10: 1–8.
- 464 16. Pitzer VE, Viboud C, Alonso WJ, Wilcox T, Metcalf CJ, Steiner CA, et al. Environmental  
465 drivers of the spatiotemporal dynamics of respiratory syncytial virus in the United States.  
466 *PLoS Pathog*. 2015;11: e1004591.
- 467 17. Islam MR, Hoque MN, Rahman MS, Alam ASMRU, Akther M, Puspo JA, et al. Genome-wide  
468 analysis of SARS-CoV-2 virus strains circulating worldwide implicates heterogeneity. *Sci*  
469 *Rep*. 2020;10: 14004. doi:10.1038/s41598-020-70812-6
- 470 18. Sahin AR, Erdogan A, Agaoglu PM, Dineri Y, Cakirci AY, Senel ME, et al. 2019 novel  
471 coronavirus (COVID-19) outbreak: a review of the current literature. *EJMO*. 2020;4: 1–7.
- 472 19. Sajadi MM, Habibzadeh P, Vintzileos A, Shokouhi S, Miralles-Wilhelm F, Amoroso A.  
473 Temperature and latitude analysis to predict potential spread and seasonality for COVID-19.  
474 Available SSRN 3550308. 2020.
- 475 20. Zhang X-J, Qin J-J, Cheng X, Shen L, Zhao Y-C, Yuan Y, et al. In-Hospital Use of Statins Is  
476 Associated with a Reduced Risk of Mortality among Individuals with COVID-19. *Cell Metab*.  
477 2020;32: 176-187.e4. doi:10.1016/j.cmet.2020.06.015
- 478 21. Wu Z, McGoogan JM. Characteristics of and important lessons from the coronavirus disease  
479 2019 (COVID-19) outbreak in China: summary of a report of 72 314 cases from the Chinese  
480 Center for Disease Control and Prevention. *Jama*. 2020;323: 1239–1242.
- 481 22. Xu R, Rahmandad H, Gupta M, DiGennaro C, Ghaffarzadegan N, Amini H, et al. Weather  
482 Conditions and COVID-19 Transmission: Estimates and Projections. Available SSRN  
483 3593879. 2020.

- 484 23. Briz-Redón Á, Serrano-Aroca Á. The effect of climate on the spread of the COVID-19  
485 pandemic: A review of findings, and statistical and modelling techniques. *Prog Phys Geogr*  
486 *Earth Environ.* 2020;44: 591–604. doi:10.1177/0309133320946302
- 487 24. Pedrosa M da S, Sipert CR, Nogueira FN. Altered taste in patients with COVID-19: The  
488 potential role of salivary glands. *Oral Dis.* n/a. doi:<https://doi.org/10.1111/odi.13496>
- 489 25. Luo W, Majumder M, Liu D, Poirier C, Mandl K, Lipsitch M, et al. The role of absolute  
490 humidity on transmission rates of the COVID-19 outbreak. 2020.
- 491 26. Oliveiros B, Caramelo L, Ferreira NC, Caramelo F. Role of temperature and humidity in the  
492 modulation of the doubling time of COVID-19 cases. *medRxiv.* 2020.
- 493 27. Tosepu R, Gunawan J, Effendy DS, Ahmad LOAI, Lestari H, Bahar H, et al. Correlation  
494 between weather and Covid-19 pandemic in Jakarta, Indonesia. *Sci Total Environ.* 2020;725:  
495 138436. doi:10.1016/j.scitotenv.2020.138436
- 496 28. Bashir MF, Ma B, Bilal, Komal B, Bashir MA, Tan D, et al. Correlation between climate  
497 indicators and COVID-19 pandemic in New York, USA. *Sci Total Environ.* 2020;728: 138835.  
498 doi:10.1016/j.scitotenv.2020.138835
- 499 29. Meo SA, Al-Khlaiwi T, Usmani AM, Meo AS, Klonoff DC, Hoang TD. Biological and  
500 epidemiological trends in the prevalence and mortality due to outbreaks of novel coronavirus  
501 COVID-19. *J King Saud Univ-Sci.* 2020.
- 502 30. Iddrisu WA, Appiahene P, Kessie JA. Effects of weather and policy intervention on COVID-19  
503 infection in Ghana. *ArXiv Prepr ArXiv200500106.* 2020.
- 504 31. Taiwo I, Fashola A. COVID-19 Spread and Average Temperature Distribution in Nigeria.  
505 Available SSRN 3585374. 2020.
- 506 32. Le Houérou HN. *Bioclimatology and biogeography of Africa.* Springer; 2009.
- 507 33. Kalnay E, Kanamitsu M, Kistler R, Collins W, Deaven D, Gandin L, et al. The NCEP/NCAR  
508 40-year reanalysis project. *Bull Am Meteorol Soc.* 1996;77: 437–472.
- 509 34. Moriyama M, Hugentobler WJ, Iwasaki A. Seasonality of Respiratory Viral Infections. *Annu*  
510 *Rev Virol.* 2020;7: 83–101. doi:10.1146/annurev-virology-012420-022445



- 511 35. Nachega J, Seydi M, Zumla A. The Late Arrival of Coronavirus Disease 2019 (COVID-19) in  
512 Africa: Mitigating Pan-continental Spread. *Clin Infect Dis.* 2020;71: 875–878.  
513 doi:10.1093/cid/ciaa353
- 514 36. Njenga MK, Dawa J, Nanyingi M, Gachohi J, Ngere I, Letko M, et al. Why is There Low  
515 Morbidity and Mortality of COVID-19 in Africa? *Am J Trop Med Hyg.* 2020; tpmd200474.
- 516 37. Ficetola GF, Rubolini D. Climate affects global patterns of COVID-19 early outbreak  
517 dynamics. *medRxiv.* 2020.
- 518 38. Sajadi MM, Habibzadeh P, Vintzileos A, Shokouhi S, Miralles-Wilhelm F, Amoroso A.  
519 Temperature and latitude analysis to predict potential spread and seasonality for COVID-19.  
520 Available SSRN 3550308. 2020.
- 521 39. Ou-Yang C-F, Lin N-H, Lin C-C, Wang S-H, Sheu G-R, Lee C-T, et al. Characteristics of  
522 atmospheric carbon monoxide at a high-mountain background station in East Asia. *Atmos*  
523 *Environ.* 2014;89: 613–622.
- 524 40. Pani SK, Lin N-H, RavindraBabu S. Association of COVID-19 pandemic with meteorological  
525 parameters over Singapore. *Sci Total Environ.* 2020;740: 140112.  
526 doi:10.1016/j.scitotenv.2020.140112
- 527 41. Taiwo I, Fashola A. COVID-19 Spread and Average Temperature Distribution in Nigeria.  
528 Available SSRN 3585374. 2020.
- 529 42. Lauer SA, Grantz KH, Bi Q, Jones FK, Zheng Q, Meredith HR, et al. The incubation period of  
530 coronavirus disease 2019 (COVID-19) from publicly reported confirmed cases: estimation and  
531 application. *Ann Intern Med.* 2020;172: 577–582.
- 532 43. Lolli S, Chen Y-C, Wang S-H, Vivone G. Impact of meteorological conditions and air pollution  
533 on COVID-19 pandemic transmission in Italy. *Sci Rep.* 2020;10: 16213. doi:10.1038/s41598-  
534 020-73197-8
- 535 44. Hayward DF, Oguntoyinbo JS. *Climatology of West Africa.* Routledge; 2019.
- 536 45. Kottek M, Grieser J, Beck C, Rudolf B, Rubel F. World map of the Köppen-Geiger climate  
537 classification updated. *Meteorol Z.* 2006;15: 259–263.
- 538 46. Le Houérou H. *Atlas of climatic diagrams for the isoclimatic Mediterranean zones.* 2005.

- 539 47. Mobolade TD, Pourvahidi P. Bioclimatic Approach for Climate Classification of Nigeria.  
540 Sustainability. 2020;12: 1–25.
- 541 48. Croux C, Dehon C. Influence functions of the Spearman and Kendall correlation measures.  
542 Stat Methods Appl. 2010;19: 497–515.
- 543 49. Sy S, Madonna F, Rosoldi M, Tramutola E, Gagliardi S, Proto M, et al. Sensitivity of trends to  
544 estimation methods and quantification of subsampling effects in global radiosounding  
545 temperature and humidity time series. Int J Climatol. 2020;41: E1992–E2014.  
546 doi:10.1002/joc.6827
- 547 50. Sy S, Quesada B. Anthropogenic land cover change impact on climate extremes during the  
548 21st century. Environ Res Lett. 2020;15: 034002. doi:10.1088/1748-9326/ab702c
- 549 51. Lau SKP, Luk HKH, Wong ACP, Li KSM, Zhu L, He Z, et al. Possible Bat Origin of Severe  
550 Acute Respiratory Syndrome Coronavirus 2. Emerg Infect Dis. 2020;26: 1542–1547.  
551 doi:10.3201/eid2607.200092
- 552 52. Casanova LM, Jeon S, Rutala WA, Weber DJ, Sobsey MD. Effects of air temperature and  
553 relative humidity on coronavirus survival on surfaces. Appl Environ Microbiol. 2010;76:  
554 2712–2717.
- 555 53. Chin AWH, Chu JTS, Perera MRA, Hui KPY, Yen H-L, Chan MCW, et al. Stability of SARS-  
556 CoV-2 in different environmental conditions. Lancet Microbe. 2020;1: e10.  
557 doi:10.1016/S2666-5247(20)30003-3
- 558 54. Pedrosa RHL. The dynamics of Covid-19: weather, demographics and infection timeline.  
559 medRxiv. 2020; 2020.04.21.20074450. doi:10.1101/2020.04.21.20074450
- 560 55. Lau SKP, Woo PCY, Li KSM, Huang Y, Tsoi H-W, Wong BHL, et al. Severe acute respiratory  
561 syndrome coronavirus-like virus in Chinese horseshoe bats. Proc Natl Acad Sci. 2005;102:  
562 14040–14045. doi:10.1073/pnas.0506735102
- 563
- 564

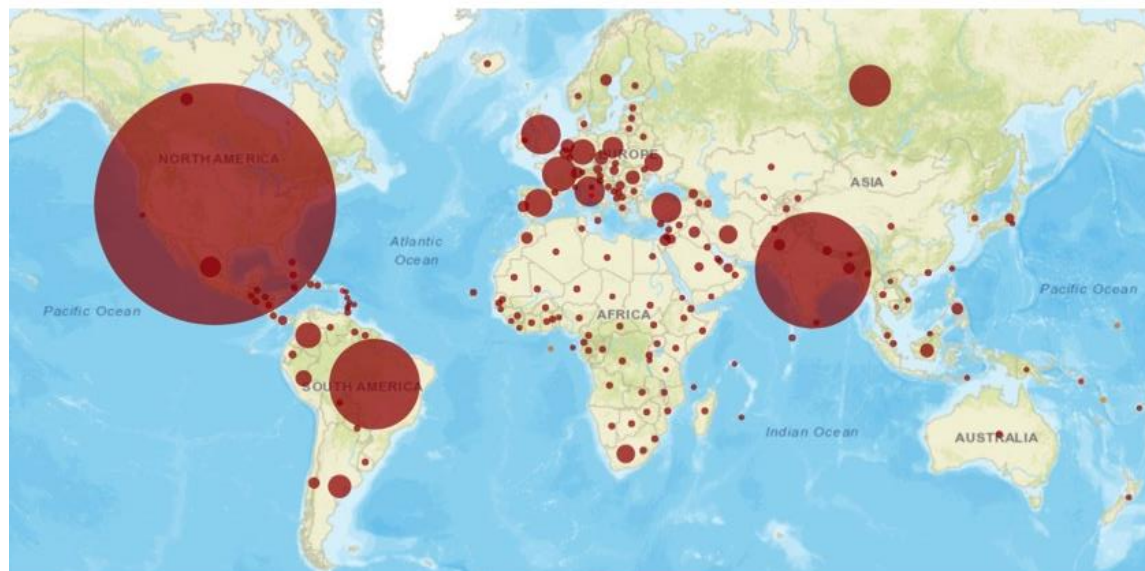

**Fig 1. COVID-19 cumulative infection cases by country.** The map of COVID-19 pandemic transmission shows the most affected countries at this time are: US, India, Brazil, UK and Russia with a very slow infection rate in African countries. Source: <https://infographics.channelnewsasia.com/covid-19/map.html>

## Number of Confirmed Cases of Covid-19 in Mar-Nov in WA and NA

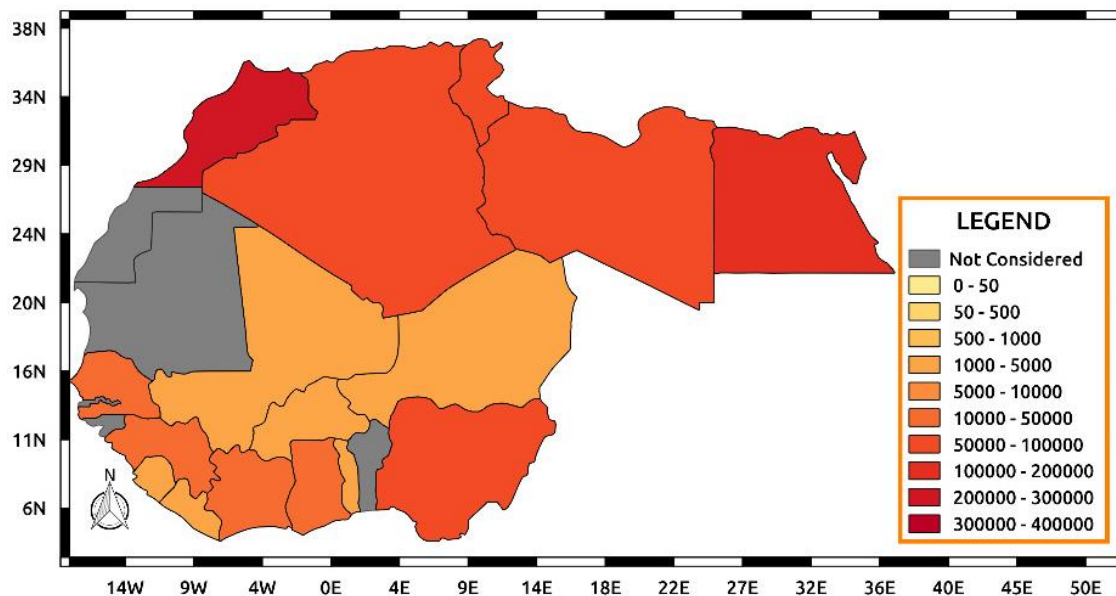

**Fig 2. Spatial patterns of the total number of COVID-19 confirmed cases between March 1, to November 30, 2020 over all the considered countries.** The countries were selected based on their high population density and the regularity of the reported daily positive cases.

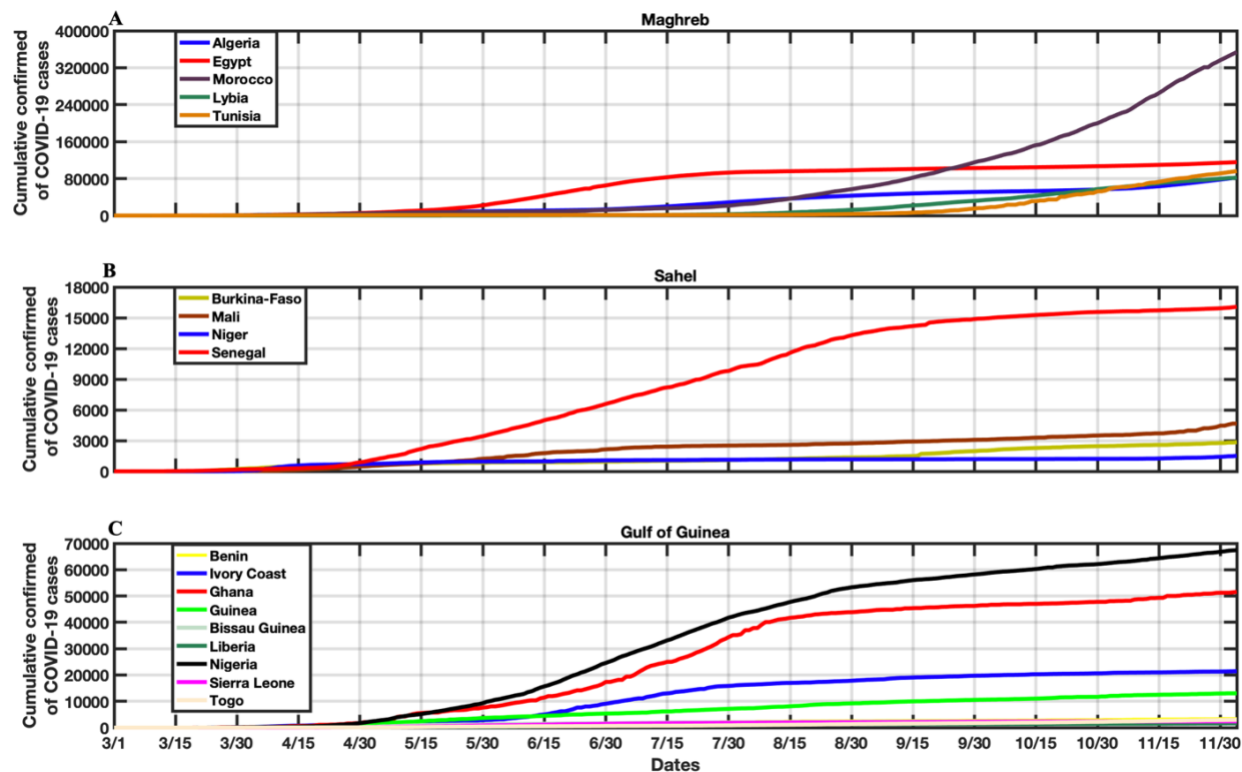

**Fig 3. Growth curve of the cumulative confirmed COVID-19 cases over A) the Maghreb countries, B) over the Sahel countries and C) the Gulf of Guinea countries (between March 1 to November 30, 2020).** Due to the large difference in the amplitudes between the three different African bio-climatic zones, the y-axis is capped at 400000 cases for Maghreb, 18000 cases for Sahel and 70000 cases for Gulf of Guinea.

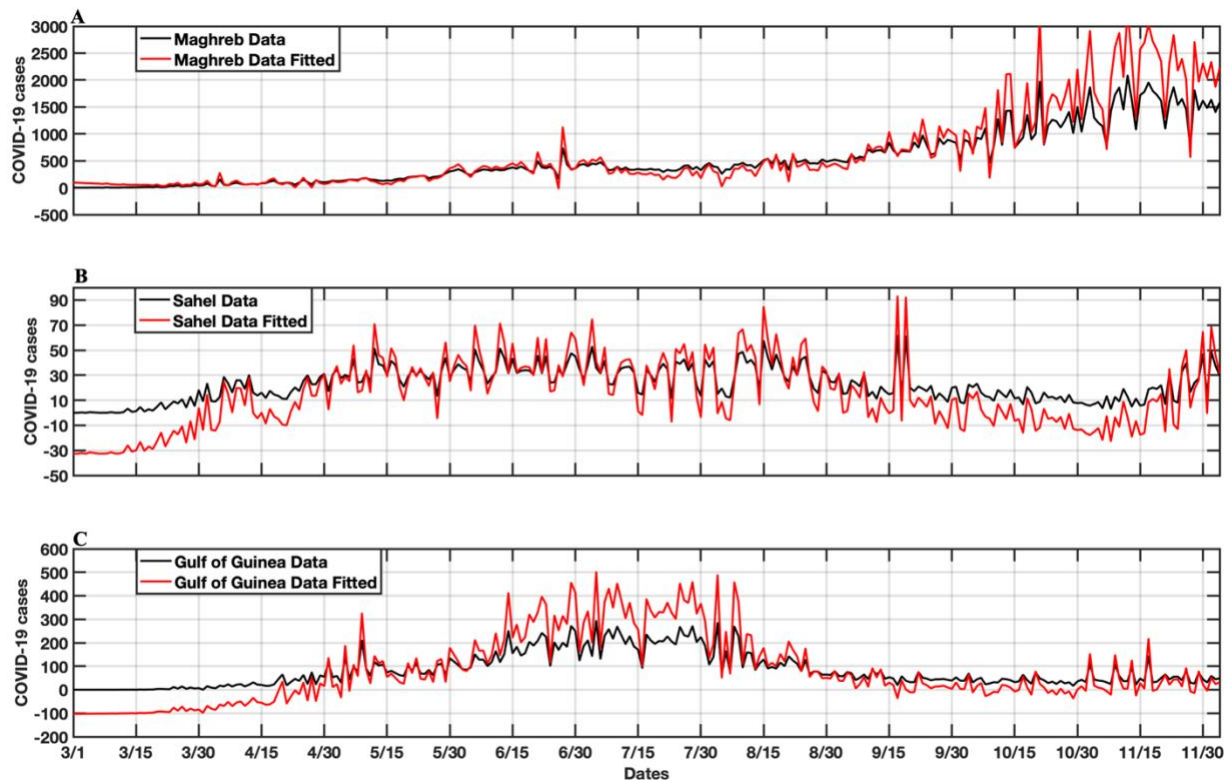

**Fig 4. COVID-19 confirmed cases fitted by a MBLM model [49], extrapolated from the observed COVID-19 data over the A) Maghreb, B) Sahel, and C) Gulf of Guinea regions. The residuals (i.e., the differences between the MBLM fitted curve and the observed curve) (Figs. 6A, 6C and 6E) are used to investigate the correlation with the detrended anomaly of the meteorological variables.**

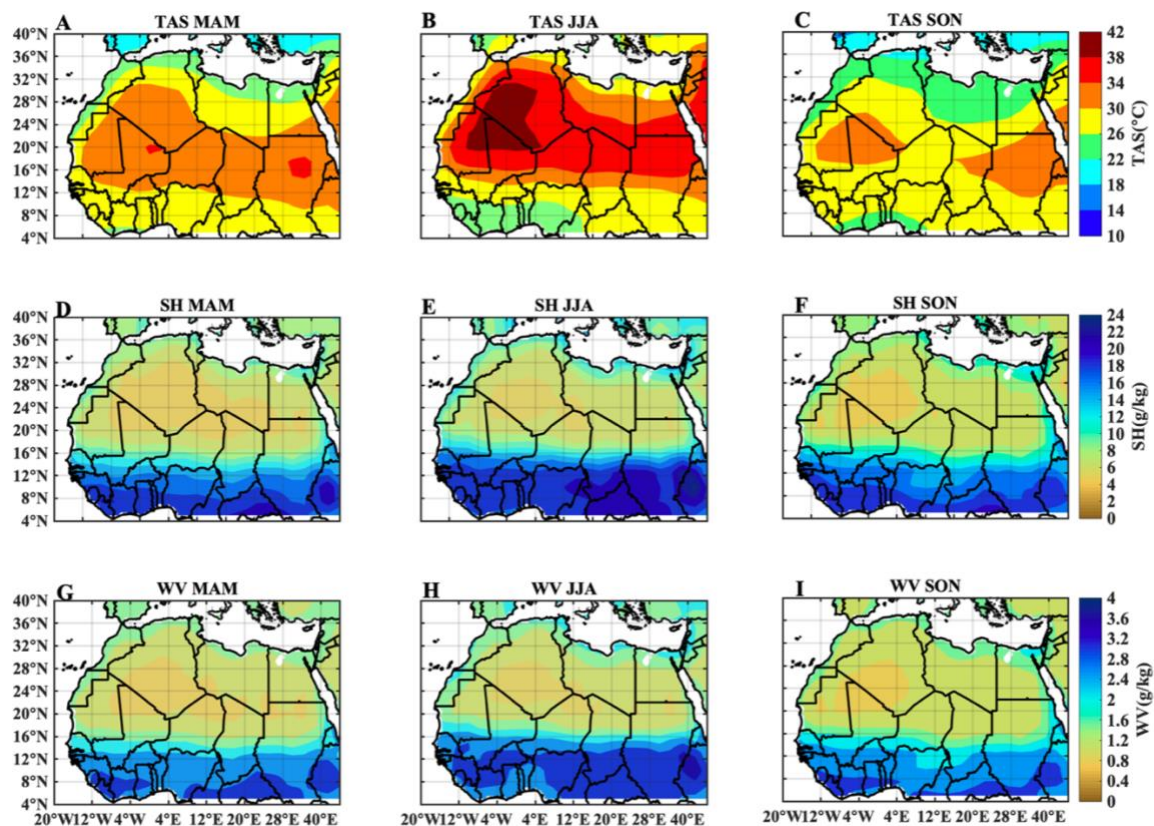

**Fig 5. Seasonal spatial patterns of climate parameters over the North and West African countries (20°W-40E; 4°N-40°N). A) surface air temperature in MAM, B) in JJA and C) in SON; D) specific humidity in MAM, E) in JJA and F) in SON; G) water vapor in MAM, H) in JJA and I) in SON**

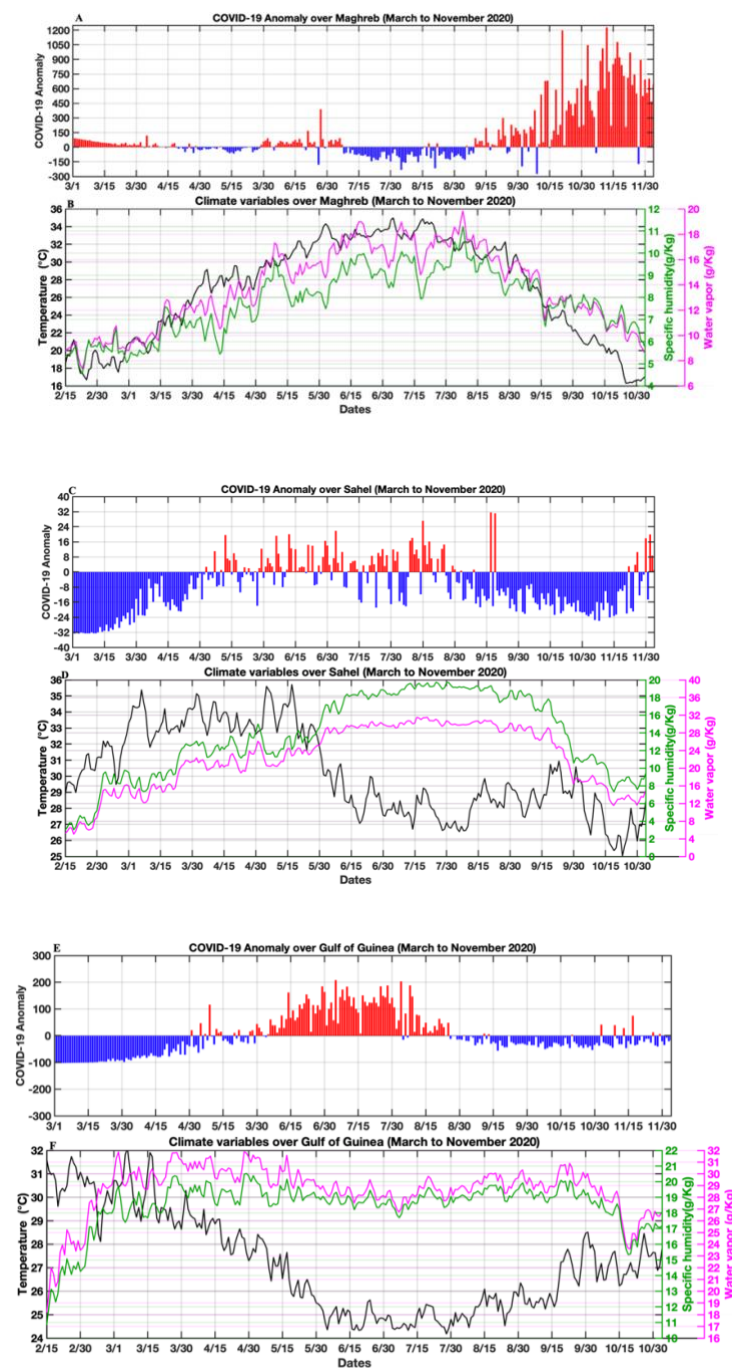

**Fig 6. COVID-19 daily case anomaly (residual) and climates parameters for the period between March 1 and November 30, 2020. A and B) for Maghreb, C and D) for Sahel and E and F) for Gulf of Guinea.**



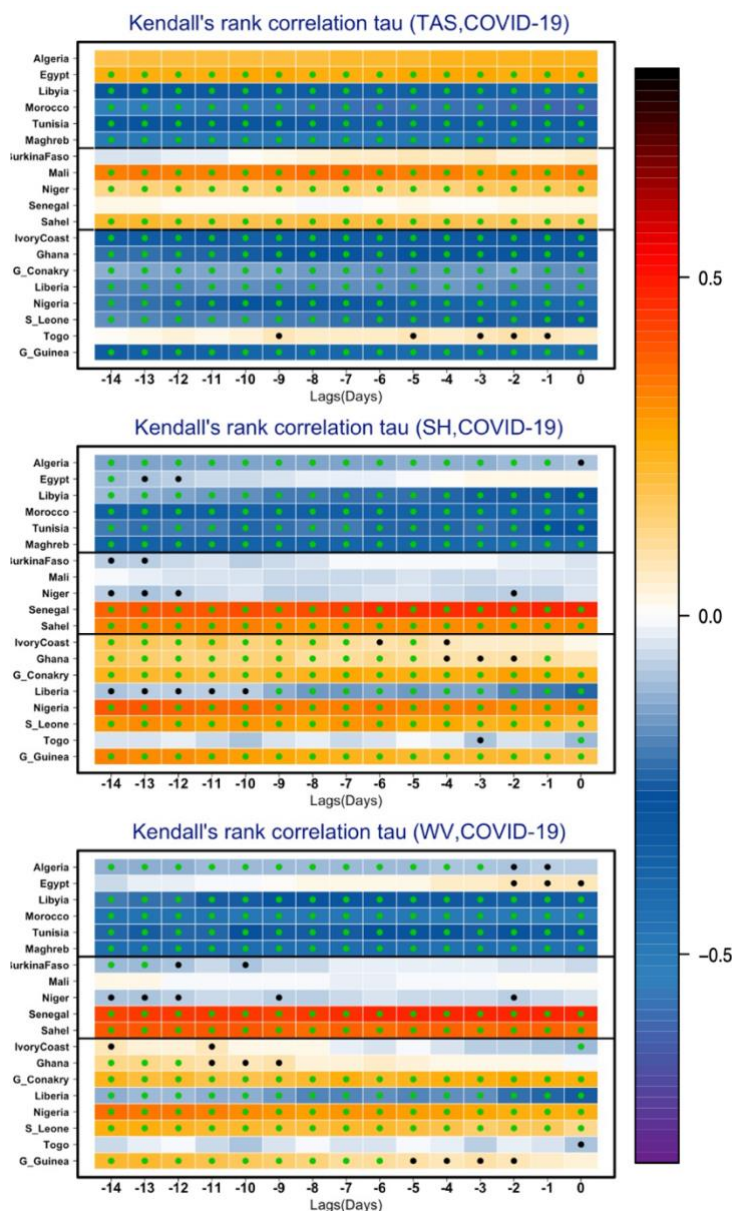

**Fig 7. Kendall non-linear rank correlation ( $\tau$ ) test between the detrended anomaly of the meteorological variables and the residuals of COVID-19 cases over the selected Northern and Western African countries, as well as area averages over the three bioclimatic regions: the Maghreb, the Sahel and Gulf of Guinea.** Significant correlations with 99% confidence intervals, that is, correlation that passed the Kendall rank tests at 0.01 level (i.e.,  $p < 0.01$ ; 99% C.I), are reported in green dots, while correlations that passed the Kendall rank tests at 0.05 level (i.e.,  $p < 0.05$ ; 95% C.I), are reported in black dots. The correlations are investigated against the residual of COVID-19 cases with a time-shift of 15 days (i.e., with a time-lag of -14 days) to take into consideration the incubation period.
